# Supplementary material for: Silencing of the Slt2-Type MAP Kinase Bmp3 in Botrytis cinerea by Application of Exogenous dsRNA Affects Fungal Growth and Virulence on Lactuca sativa
Source: MDPI journal article supplement (doi:10.3390/ijms22105362), 2021-05-19
Supplement: s1 [file s1]

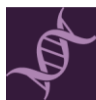

*Supplementary Materials*

# Silencing of the Slt2-type MAP kinase *Bmp3* in *Botrytis cinerea* by application of exogenous dsRNA affects fungal growth and virulence on *Lactuca sativa*

Maria Spada <sup>\*1</sup>, Claudio Pugliesi <sup>1</sup>, Marco Fambrini <sup>1</sup> and Susanna Pecchia <sup>\*1,2</sup>

<sup>1</sup> Department of Agriculture Food and Environment, University of Pisa, Via del Borghetto 80, 56124 Pisa, Italy; claudio.pugliesi@unipi.it (C.P.); marco.fambrini@unipi.it (M.F.)

<sup>2</sup> Interdepartmental Research Center Nutrafood "Nutraceuticals and Food for Health", University of Pisa, Via del Borghetto 80, 56124, Pisa, Italy

\* Correspondence: maria.spada@phd.unipi.it (M.S.); susanna.pecchia@unipi.it (S.P.)

**ATG**GCAGACCTGCAAGGAAGAAAGGTCTTCAAGGTCTTCAACCAAGACTTTATCGTCGACGAGAGATACACAGTCACCAAG  
 GAGCTTGGTCAAGGAGCTTACGGTATTGTTTGG**TACGATGTTACTTTCCCTCCGACCCTACCTGCATATGCGCATGTCCGT**  
**ATCATGAACCTTCAACTAACATTGTTCTCCATGGCAG**TGCTGCTACGAATTCTCAAACACAGGAAGGTGTCGCAATTAAGA  
 AAGTTACAAATGTCTTCAGCAAGAAGATTTTGGCAAAGCGTGCGCTGCGTGAGATAAAGTTGCTACAACATTTTCAGAGGTC  
 ATCGTAAC**GTATGCGACTCCTATTACACTCACGATAATGGTGGTGGGGTAGTTCTAACATGGGATAG**ATTACCTGCCTTTA  
 TGATATGGATATTCCCTCGACCAGATAACTTTAATGAAACATATCTCTATGAAG**GTAAGATGGGGGATTGTTTCCTGTAAC**  
**CGTTGTTCCATGCTAATAATCTTTTCGCAG**AGCTCATGGAGTGTGATCTCGCTGCTATCGTACGATCCGGTCAACCCCTCA  
 CTGATGCACATTTCCAATCTTTCATTTACCAAATCCTTTGCGGTCTAAAATATATTCATTCCGCGAATGTTCTCCATCGTG  
 ATTTGAAGCCCGGTAATTTGCTGGTCAATGCCGACTGCGAGTTGAAGATCTGTGATTTTCGGTCTTGCTAGAGGTTTCTCTG  
 TCGACCCCGAAGAGAATGCAGGATACATGACCGAATACGTTGCTACAAGATGGTATCGTGCCCTGAAATTATGTTGAGCT  
 TCCAGAGCTATACAAAAGCTA**GTAAGTTATGCAACCATTTGGTTGGAAAAAGATTATAAGCGCTGACATAAATTAG**TCGAC  
 GTATGGTCAGTAGGATGTATTCTCGAGAATTGCTAGGCGGTCTCCTTTCTTCAAAGGTAGAGATTATGTTGATCAACTC  
 AACCAAATTTTACATATCCTTTGGTACACCAAATGAAGAAACCCCTTCAAGAATTGGATCG**CCACGAGCACAGGAATATG**TT  
 CGAAACCTCCCATATATGGCGAAGCGACCTTTCCCAACTTTATTTCCCAACGCCAACCCCGACGCCCTTGACCTTCTTGAT  
 CATATGTTAGCCTTTGATCCATCTTCCCGTATCGATGTGAAACTGCCCTCGAACACCCATACCTTCACATTTGGCAGGAC  
 GCCTCTGATGAGCCTGGATGCCCCAACACATTTAACTTCGATTTTGAAGTTGTGGAAGATGTAGGCGAGATCAGAAAGTTG  
 ATTTTGAAGAGGTTTACAGATTTCAGACAACATGTCCGTGTTCAACCTGGTCAACAAGGCCAGAGCAACGGCCCTCAAGTA  
 CCTATACCACAAGAACAAGCAAGCTGGCGTGCCGAGGATCCAAGGCCACAAGAAGCTTATGG**ACAAGGGCCAAATGATCTT**  
**GAACAAGATTTACAAGGTGGTTTGGATGCTATGCGATCCTAG**

**Figure S1.** Nucleotide sequence of the *Bmp3* gene of *Botrytis cinerea* B05.10 [1]. The start and stop codons are in bold characters and highlighted in green and magenta, respectively. The non-coding intronic regions are highlighted in yellow. The annealing part of the primers with T7 promoter are highlighted in light blue and gray (see also Table S2).

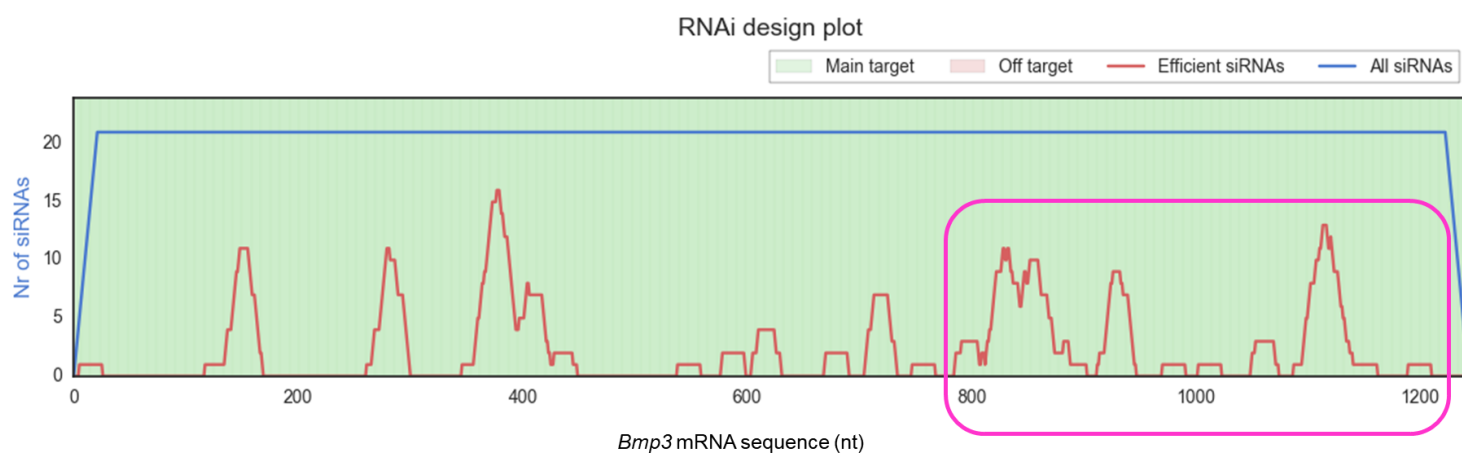

**Figure S2.** Graphical output of the predicted total and efficient siRNA hits in the *Botrytis cinerea* B05.10 *Bmp3* mRNA calculated by the si-Fi v21 software. The pink box includes the sequence used to generate the fragment of 427 bp for the synthesis of dsRNA (fifth exon of the gene, see Figure S1).

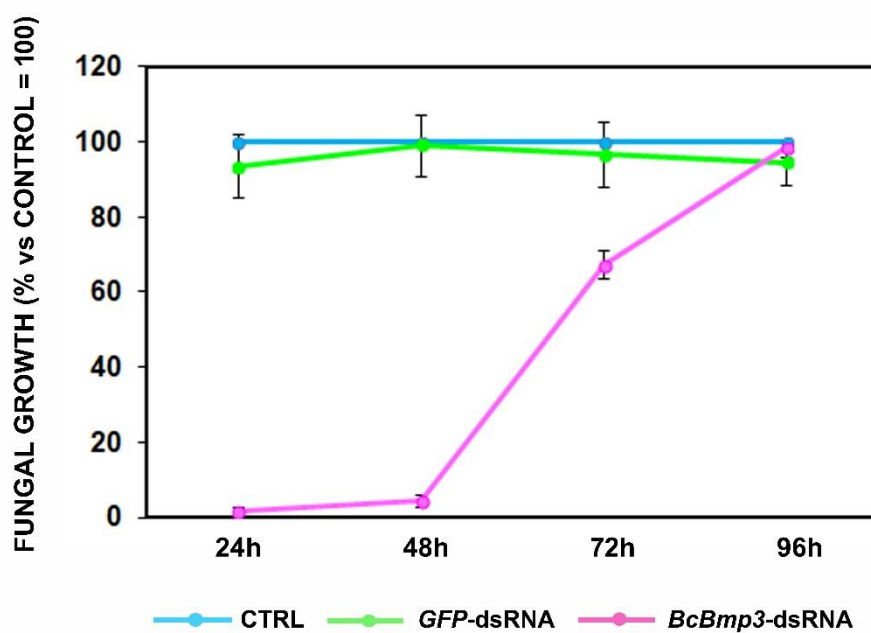

**Figure S3.** *In vitro* effects of *BcBmp3*-dsRNA on *B. cinerea* B05.10 growth. Fungal growth was assessed measuring the optical density (OD) at 595 nm at 24, 48, 72 and 96 hours (24h, 48h, 72h and 96h) in 96-well microtiter plates. Each well contained 500 conidia in SMB medium and 2  $\mu$ g of *GFP*-dsRNA or *BcBmp3*-dsRNA. SMB + TE buffer was used as control (CTRL). The graph shows the mean ( $\pm$  SE) of two independent experiments with eight biological replicates ( $n = 8$ ). Data obtained from the *in vitro* assay were converted as growth percentage of untreated control.

**Table S1.** Prediction of *BcBmp3* off-target transcripts using the si-Fi v21 software.

|                                                          | All siRNA* | Efficient siRNA** |
|----------------------------------------------------------|------------|-------------------|
| <i>Botrytis cinerea</i> B05.10 <sup>a</sup>              | 407        | 210               |
| <i>Botrytis cinerea</i> T4 <sup>b</sup>                  | 407        | 210               |
| <i>Botrytis cinerea</i> DW1 <sup>c</sup>                 | 386        | 202               |
| <i>Sclerotinia sclerotiorum</i> <sup>d</sup>             | 18         | 9                 |
| <i>Sclerotinia sclerotiorum</i> 1980 UF-70 <sup>e</sup>  | 18         | 9                 |
| <i>Alternaria alternata</i> SRC11rK2 <sup>f</sup>        | 0          | 0                 |
| <i>Fusarium oxysporum</i> <sup>g</sup>                   | 0          | 0                 |
| <i>Rhizoctonia solani</i> AG-1 IA <sup>h</sup>           | 0          | 0                 |
| <i>Pythium ultimum</i> ASM14694 <sup>i</sup>             | 0          | 0                 |
| <i>Trichoderma asperellum</i> CBS 433.97 <sup>l</sup>    | 0          | 0                 |
| <i>Trichoderma harzianum</i> T6776 <sup>m</sup>          | 0          | 0                 |
| <i>Rhizoglyphus irregularis</i> DAOM 197198 <sup>n</sup> | 0          | 0                 |
| <i>Lactuca sativa</i> cv. Salinas <sup>o</sup>           | 0          | 0                 |
| <i>Homo sapiens</i> (GRCh38.p13) <sup>p</sup>            | 0          | 0                 |

Below the links of the cDNA gene sequence files are reported:

<sup>a</sup> [ftp://ftp.ensemblgenomes.org/pub/fungi/release-50/fasta/botrytis\\_cinerea/cdna/](ftp://ftp.ensemblgenomes.org/pub/fungi/release-50/fasta/botrytis_cinerea/cdna/)

<sup>b</sup> [ftp://ftp.ensemblgenomes.org/pub/fungi/release-50/fasta/fungi\\_ascomycota1\\_collection/botrytis\\_cinerea\\_t4\\_gca\\_000227075/cdna/](ftp://ftp.ensemblgenomes.org/pub/fungi/release-50/fasta/fungi_ascomycota1_collection/botrytis_cinerea_t4_gca_000227075/cdna/)

<sup>c</sup> [ftp://ftp.ensemblgenomes.org/pub/fungi/release-50/fasta/fungi\\_ascomycota1\\_collection/botrytis\\_cinerea\\_bcdw1\\_gca\\_000349525/cdna/](ftp://ftp.ensemblgenomes.org/pub/fungi/release-50/fasta/fungi_ascomycota1_collection/botrytis_cinerea_bcdw1_gca_000349525/cdna/)

<sup>d</sup> [ftp://ftp.ensemblgenomes.org/pub/fungi/release-50/fasta/sclerotinia\\_sclerotiorum/cdna/](ftp://ftp.ensemblgenomes.org/pub/fungi/release-50/fasta/sclerotinia_sclerotiorum/cdna/)

<sup>e</sup> [ftp://ftp.ensemblgenomes.org/pub/fungi/release-50/fasta/fungi\\_ascomycota3\\_collection/sclerotinia\\_sclerotiorum\\_1980\\_uf\\_70\\_gca\\_001857865/cdna/](ftp://ftp.ensemblgenomes.org/pub/fungi/release-50/fasta/fungi_ascomycota3_collection/sclerotinia_sclerotiorum_1980_uf_70_gca_001857865/cdna/)

<sup>f</sup> [ftp://ftp.ensemblgenomes.org/pub/fungi/release-50/fasta/fungi\\_ascomycota3\\_collection/alternaria\\_alternata\\_gca\\_001642055/cdna/](ftp://ftp.ensemblgenomes.org/pub/fungi/release-50/fasta/fungi_ascomycota3_collection/alternaria_alternata_gca_001642055/cdna/)

<sup>g</sup> [ftp://ftp.ensemblgenomes.org/pub/fungi/release-50/fasta/fusarium\\_oxysporum/cdna/](ftp://ftp.ensemblgenomes.org/pub/fungi/release-50/fasta/fusarium_oxysporum/cdna/)

<sup>h</sup> [ftp://ftp.ensemblgenomes.org/pub/fungi/release-50/fasta/fungi\\_basidiomycota1\\_collection/rhizoctonia\\_solani\\_ag\\_1\\_ia\\_gca\\_000334115/cdna/](ftp://ftp.ensemblgenomes.org/pub/fungi/release-50/fasta/fungi_basidiomycota1_collection/rhizoctonia_solani_ag_1_ia_gca_000334115/cdna/)

<sup>i</sup> [ftp://ftp.ensemblgenomes.org/pub/protists/release-50/fasta/pythium\\_ultimum/cdna/](ftp://ftp.ensemblgenomes.org/pub/protists/release-50/fasta/pythium_ultimum/cdna/)

<sup>l</sup> [ftp://ftp.ensemblgenomes.org/pub/fungi/release-50/fasta/fungi\\_ascomycota4\\_collection/trichoderma\\_asperellum\\_cbs\\_433\\_97\\_gca\\_003025105/cdna/](ftp://ftp.ensemblgenomes.org/pub/fungi/release-50/fasta/fungi_ascomycota4_collection/trichoderma_asperellum_cbs_433_97_gca_003025105/cdna/)

<sup>m</sup> [ftp://ftp.ensemblgenomes.org/pub/fungi/release-50/fasta/fungi\\_ascomycota2\\_collection/trichoderma\\_harzianum\\_gca\\_000988865/cdna/](ftp://ftp.ensemblgenomes.org/pub/fungi/release-50/fasta/fungi_ascomycota2_collection/trichoderma_harzianum_gca_000988865/cdna/)

<sup>n</sup> [ftp://ftp.ensemblgenomes.org/pub/fungi/release-50/fasta/fungi\\_mucoromycota1\\_collection/rhizoglyphus\\_irregularis\\_daom\\_197198w\\_gca\\_000597685/cdna/](ftp://ftp.ensemblgenomes.org/pub/fungi/release-50/fasta/fungi_mucoromycota1_collection/rhizoglyphus_irregularis_daom_197198w_gca_000597685/cdna/)

<sup>o</sup> [https://www.ncbi.nlm.nih.gov/assembly/GCA\\_002870075.2](https://www.ncbi.nlm.nih.gov/assembly/GCA_002870075.2)

<sup>p</sup> [http://ftp.ensembl.org/pub/release-103/fasta/homo\\_sapiens/cdna/](http://ftp.ensembl.org/pub/release-103/fasta/homo_sapiens/cdna/)

\* Number of siRNA sequences (21-mer) that perfectly match the query sequence.

\*\* Number of siRNA sequences (21-mer) with perfect match to the query sequence that meet additional criteria for efficient RNAi.

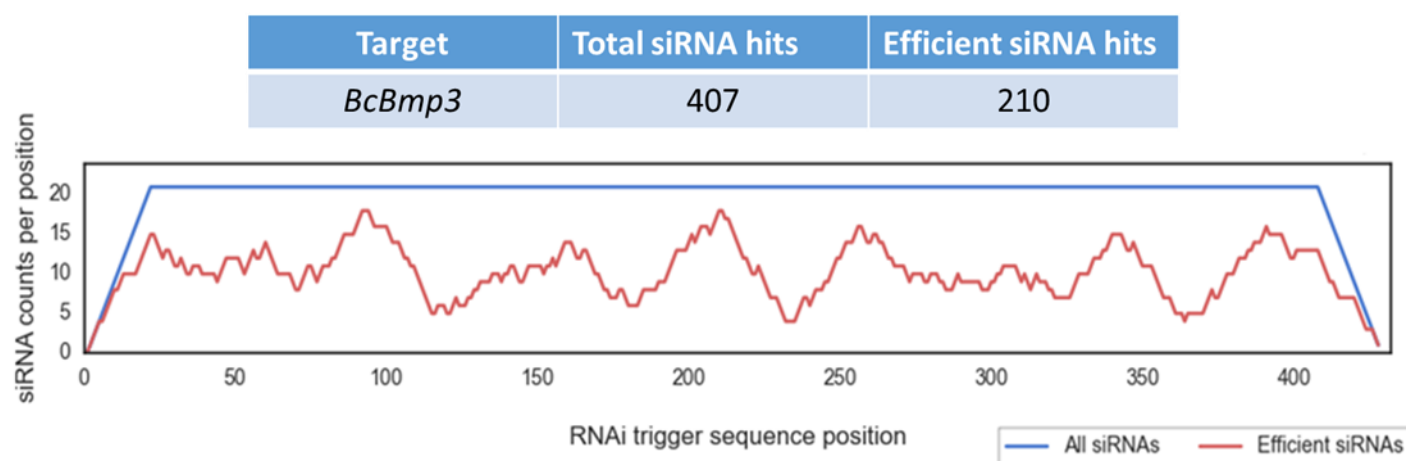

**Figure S4.** Graphical output of the predicted total and efficient siRNA hits in the *BcBmp3* fragment used for the synthesis of dsRNA calculated by the si-Fi v21 software.

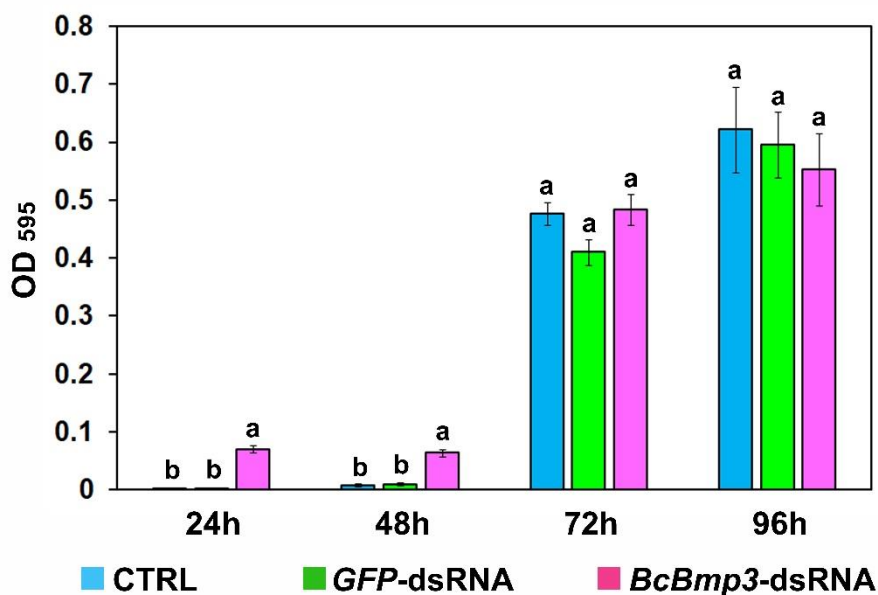

**Figure S5.** *In vitro* effects of *BcBmp3*-derived dsRNA on *Trichoderma harzianum* T6776 growth. Fungal growth was assessed measuring the optical density (OD) at 595 nm at 24, 48, 72 and 96 hours (24h, 48h, 72h and 96h) in 96-well microtiter plates. Each well contained 500 conidia in SMB medium and 2 µg of *GFP*-dsRNA or *BcBmp3*-dsRNA. SMB + TE buffer was used as control (CTRL). The graph shows the mean ( $\pm$  SE) of two independent experiments with eight biological replicates ( $n=8$ ). Same letters above the bars indicate no significant differences from each other (ANOVA) according to Tukey's test ( $p \leq 0.05$ ). The statistical analysis was conducted separately for 24, 48, 72 and 96 hours.

**Table S2.** Gene-specific primers used in this study. In square brackets is indicate the chromosome number of *Botrytis cinerea* B05.10 [1,2].

| Use                                                                                                                                      | GenBank accession number | Primer             | Primer sequence 5'-3' (F: Forward; R: Reverse)                                                                                      | Amplicon size (bp) |
|------------------------------------------------------------------------------------------------------------------------------------------|--------------------------|--------------------|-------------------------------------------------------------------------------------------------------------------------------------|--------------------|
| Amplification of the <i>Bmp3</i> gene fragment from <i>Botrytis cinerea</i> ( <i>BcBmp3</i> ) [BCIN09] for <i>in vitro</i> transcription | CP009813.1               | Bmp3T7F<br>Bmp3T7R | F: <u>TAATACGACTCACTATAGGGA</u><br><u>GACCACGAGCACAGGAATATG</u><br>R: <u>TAATACGACTCACTATAGGGA</u><br><u>GACAAGATCATTGCGCCCTTGT</u> | 427                |
| Amplification of the <i>GFP</i> gene fragment from plasmid pCT74-sGFP for <i>in vitro</i> transcription                                  |                          | GFP1T7F<br>GFP1T7R | F: <u>TAATACGACTCACTATAGGGA</u><br><u>GAGTGAGCAAGGGCGAG</u><br>R: <u>TAATACGACTCACTATAGGGA</u><br><u>GATTGTACAGCTCGTCCAT</u>        | 712                |
| Amplification by qRT-PCR of the <i>Bmp3</i> gene of <i>Botrytis cinerea</i> ( <i>BcBmp3</i> ) [BCIN09]                                   | CP009813.1               | 9F<br>8R           | F:AGAATTGCTAGGCGGTCGTC<br>R:AACATATTCCTGTGCTCGTGCC                                                                                  | 136                |
| Amplification by qRT-PCR of the housekeeping gene <i>beta tubulin A</i> of <i>Botrytis cinerea</i> ( <i>BctubA</i> ) [BCIN01]            | XM_024690731.1           | 18F<br>19R         | F:GTCTCAAGATGTCCTCCACC<br>R:ACTCCATCTCGTCCATACCT                                                                                    | 143                |
| Amplification by qRT-PCR of the housekeeping gene <i>Sac7</i> of <i>Botrytis cinerea</i> ( <i>BcSac7</i> ) [BCIN05]                      | XM_024693149.1           | 50F<br>51R         | F:CTCAGTGGCTCGGAAAAGC<br>R:CGTTTGCCGCATCATGAACTG                                                                                    | 112                |



## References

1. Amsellem, J.; Cuomo, C.A.; van Kan, J.A.; Viaud, M.; Benito, E.P.; Couloux, A.; Coutinho, P.M.; de Vries, R.P.; Dyer, P.S.; Fillinger, S.; et al. Genomic analysis of the necrotrophic fungal pathogens *Sclerotinia sclerotiorum* and *Botrytis cinerea*. *PLoS Genet.* **2011**, *7*, e1002230, doi:10.1371/journal.pgen.1002230.
  2. Van Kan, J.A.; Stassen, J.H.; Mosbach, A.; Van Der Lee, T.A.; Faino, L.; Farmer, A.D.; Papasotiriou, D.G.; Zhou, S.; Seidl, M.F.; Cottam, E.; et al. A gapless genome sequence of the fungus *Botrytis cinerea*. *Mol. Plant Pathol.* **2017**, *18*, 75–89, doi:10.1111/mpp.12384.
-
